# Supplementary material for: Venous invasion as a risk factor for recurrence after gastrectomy followed by chemotherapy for stage III gastric cancer
Source: PubMed Central journal article supplement (PMC5791734; doi:10.1186/s12885-018-4052-z), 2018-01-30
Supplement: 12885_2018_4052_MOESM2_ESM.pdf [file 12885_2018_4052_MOESM2_ESM.pdf]

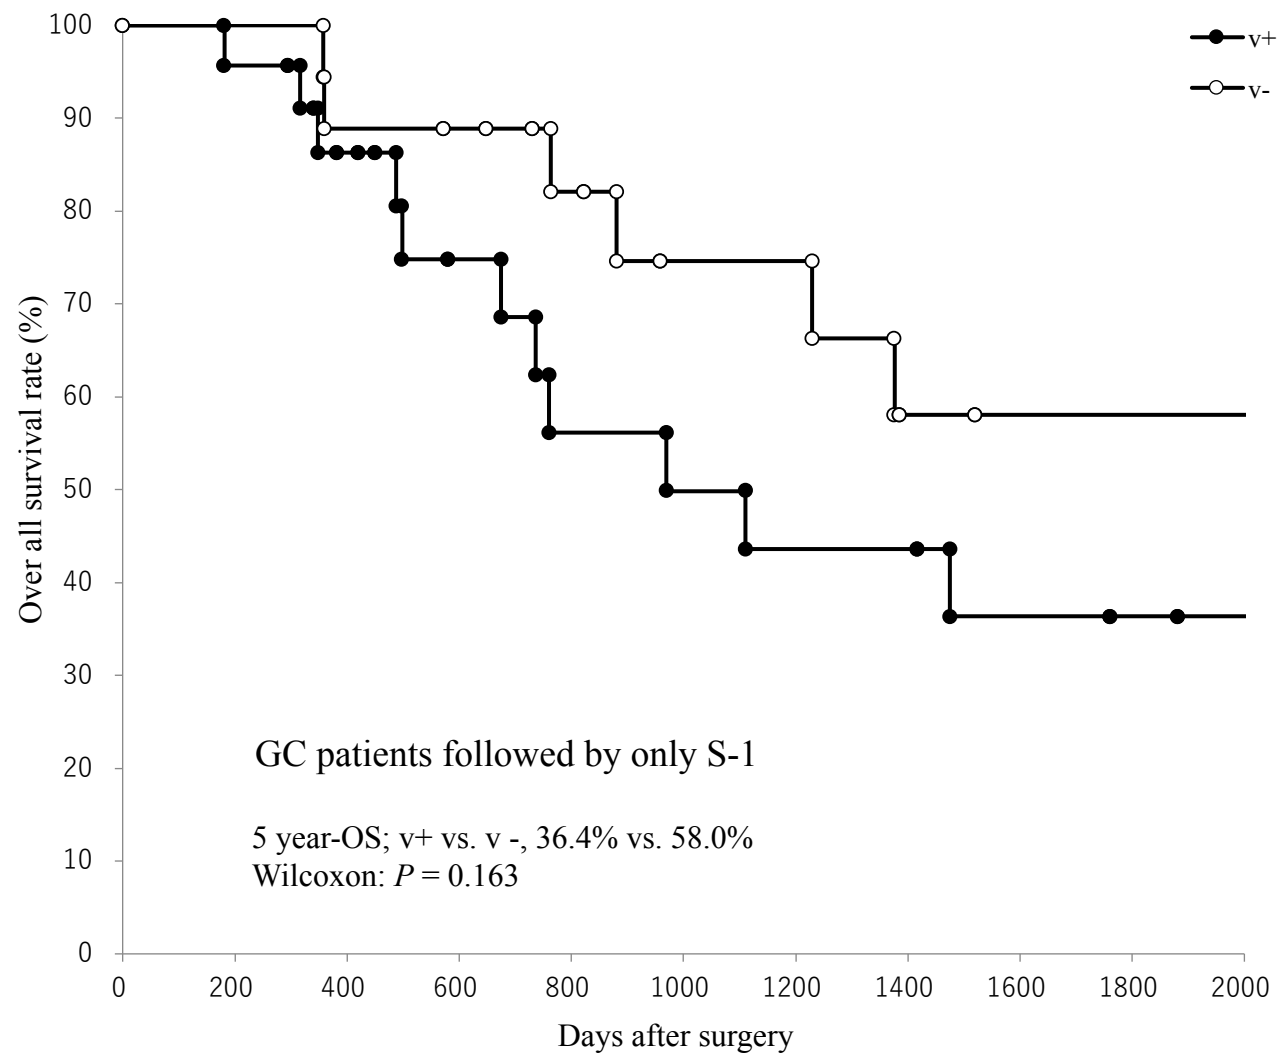

Supplement Fig. 1b
